# Supplementary material for: Topoisomerase I is an Evolutionarily Conserved Key Regulator for Satellite DNA Transcription
Source: PubMed Central journal article supplement — bioRxiv. 2024 May 5:2024.05.03.592391. Preprint. [Version 1] doi: 10.1101/2024.05.03.592391 (PMC11092777; doi:10.1101/2024.05.03.592391), 2024-05-05
Supplement: NIHPP2024.05.03.592391v1-supplement-1.pdf [file NIHPP2024.05.03.592391v1-supplement-1.pdf]

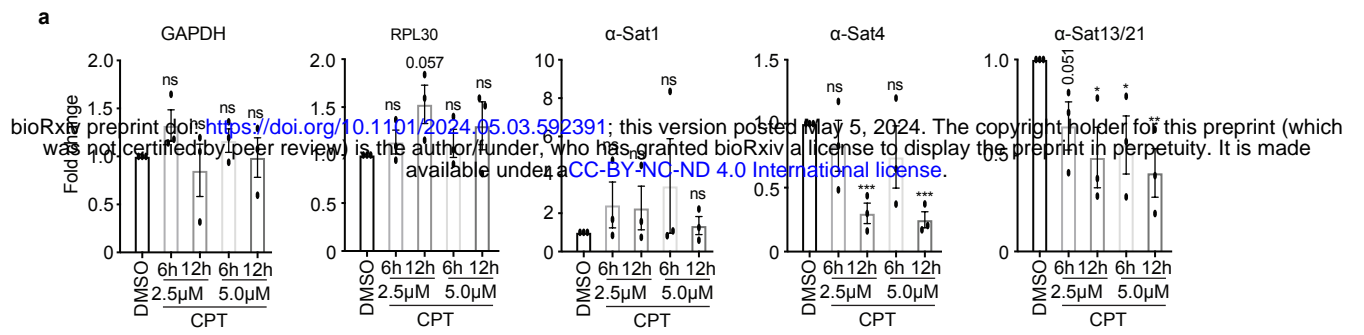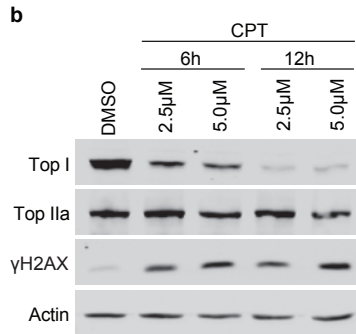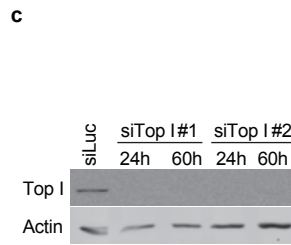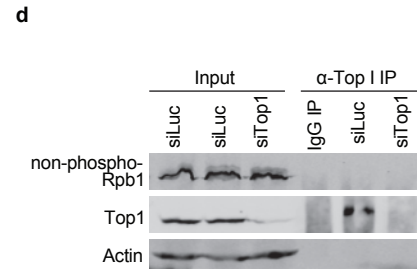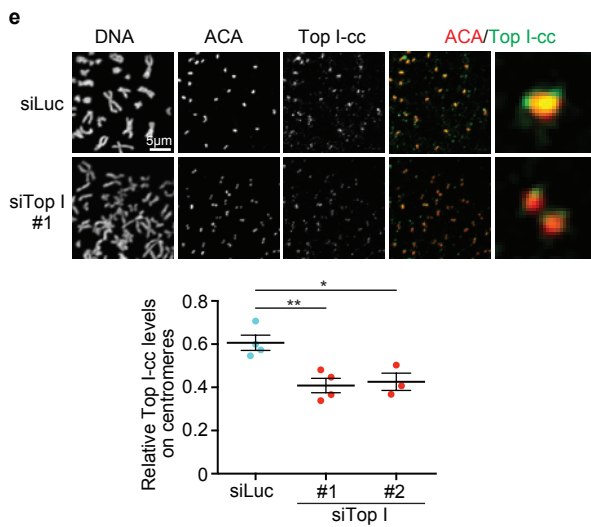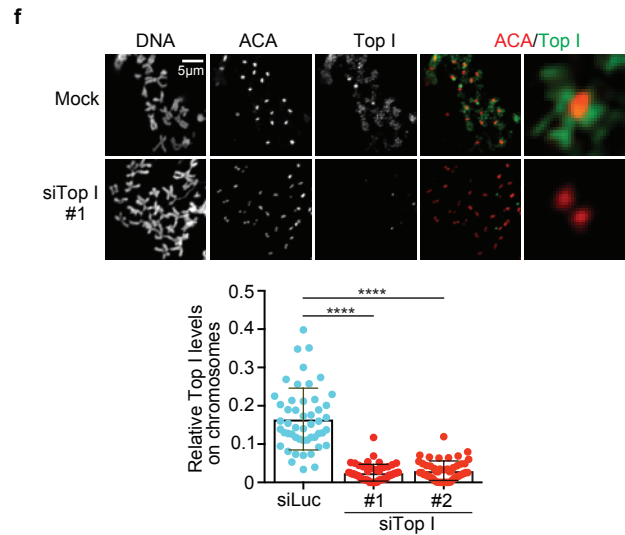

Supplementary Fig. 1

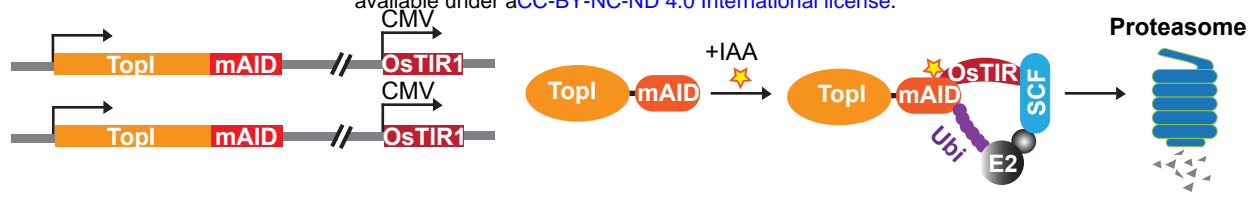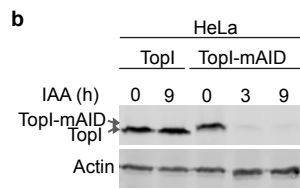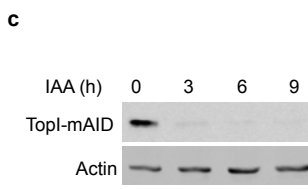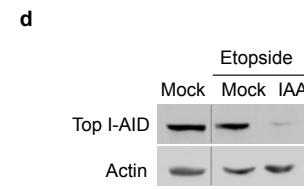

**Supplementary Fig. 2**

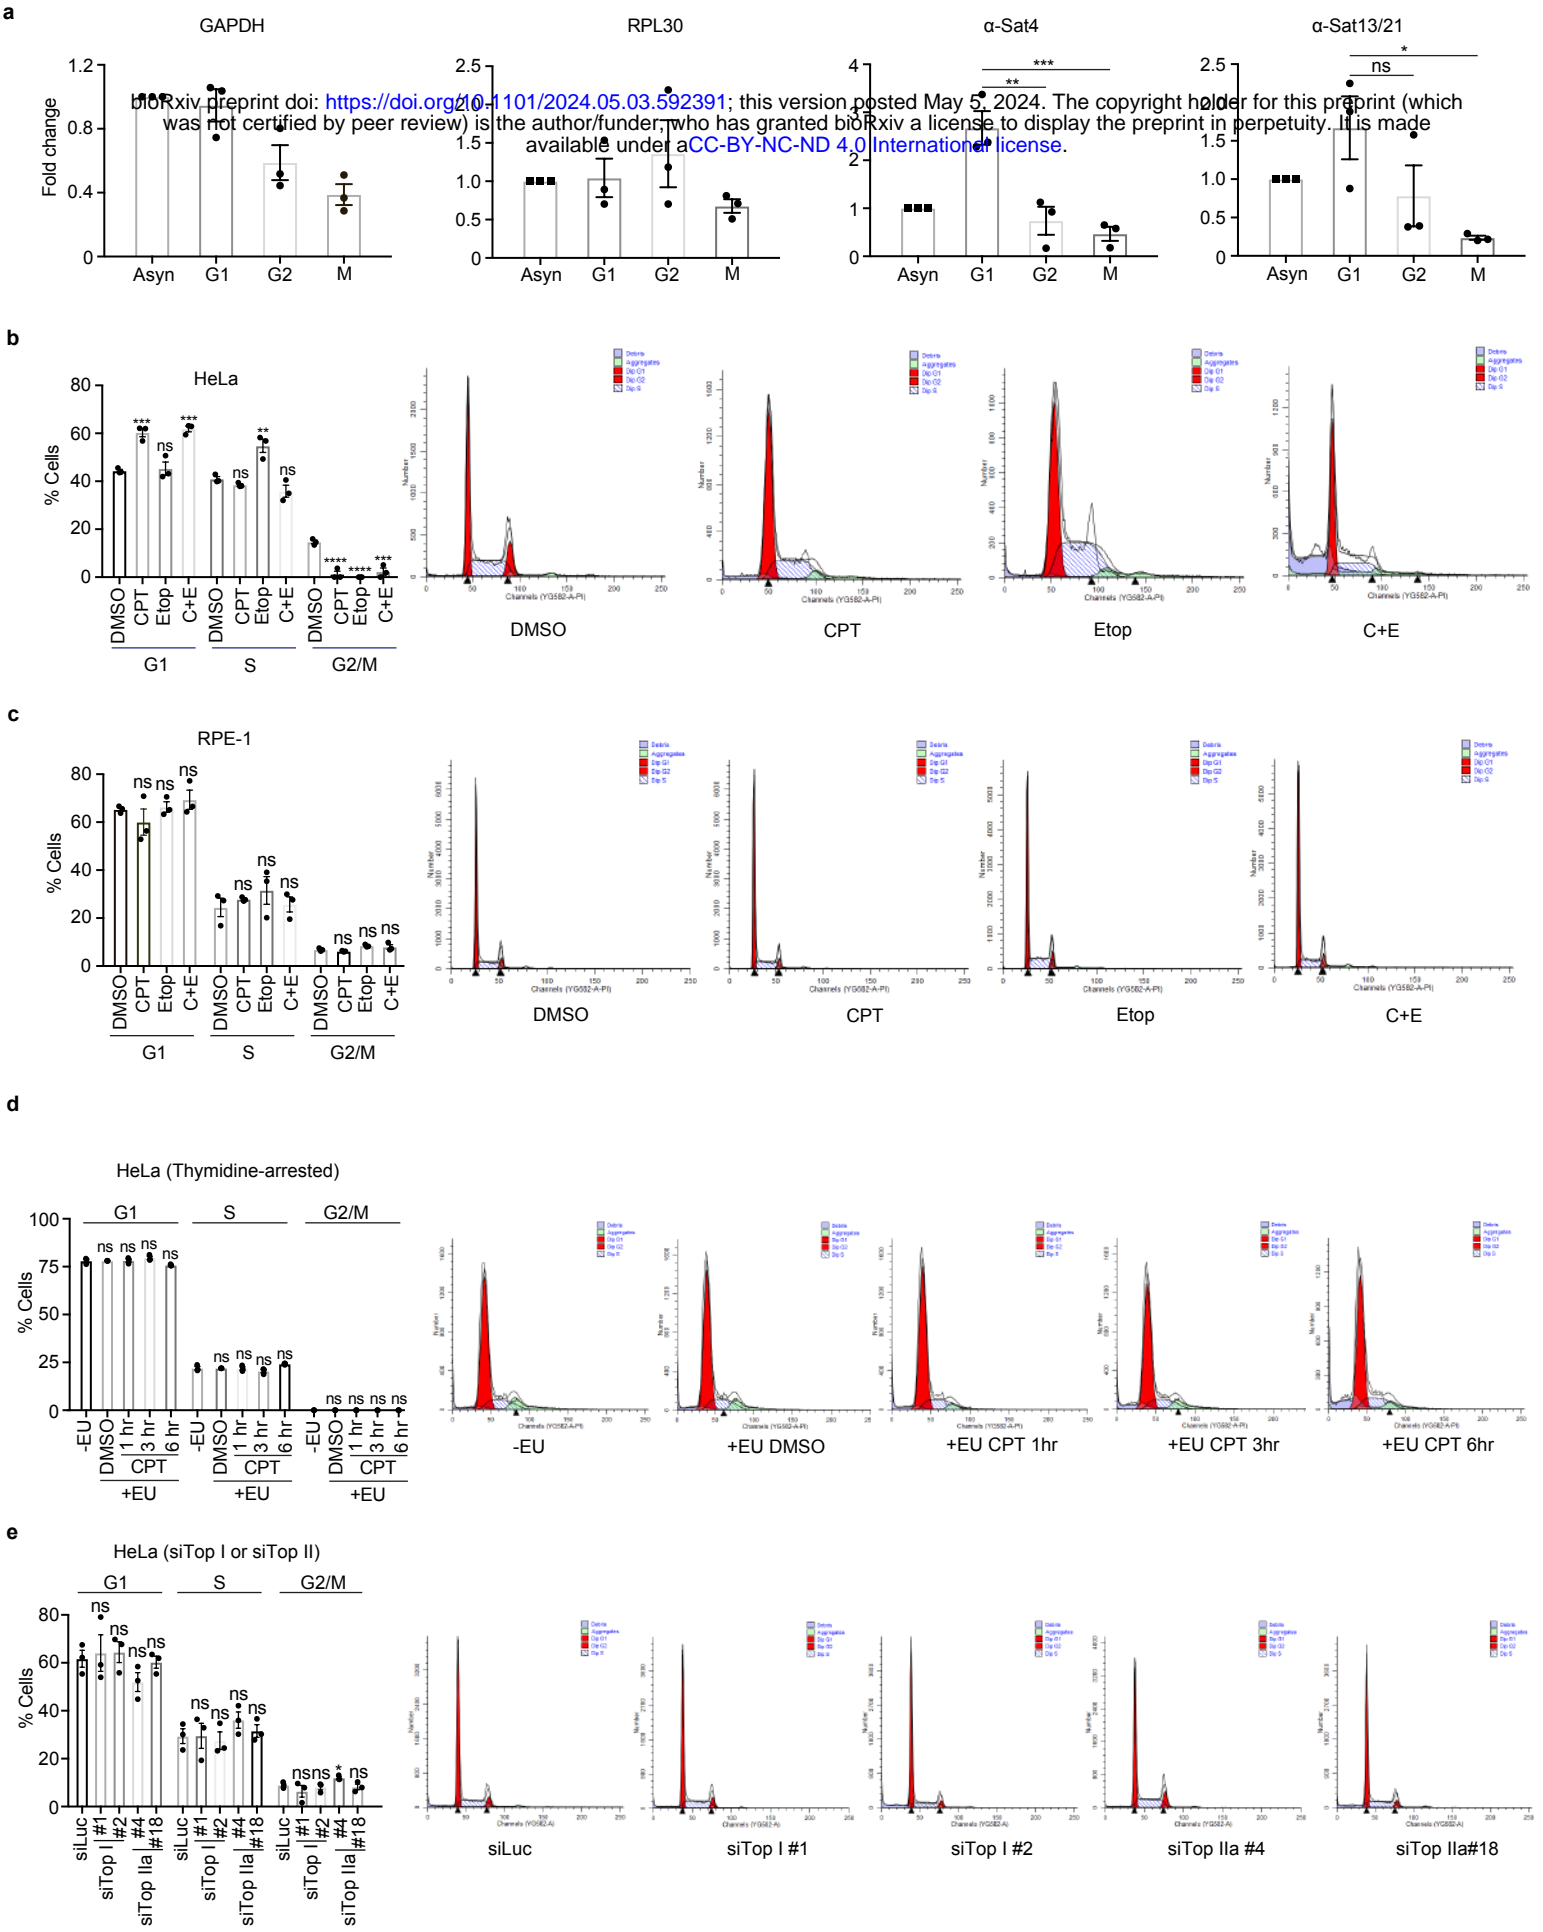

bioRxiv preprint doi: <https://doi.org/10.1101/2024.05.03.592391>; this version posted May 5, 2024. The copyright holder for this preprint (which was not certified by peer review) is the author/funder, who has granted bioRxiv a license to display the preprint in perpetuity. It is made available under aCC-BY-NC-ND 4.0 International license.

Supplementary Fig. 3

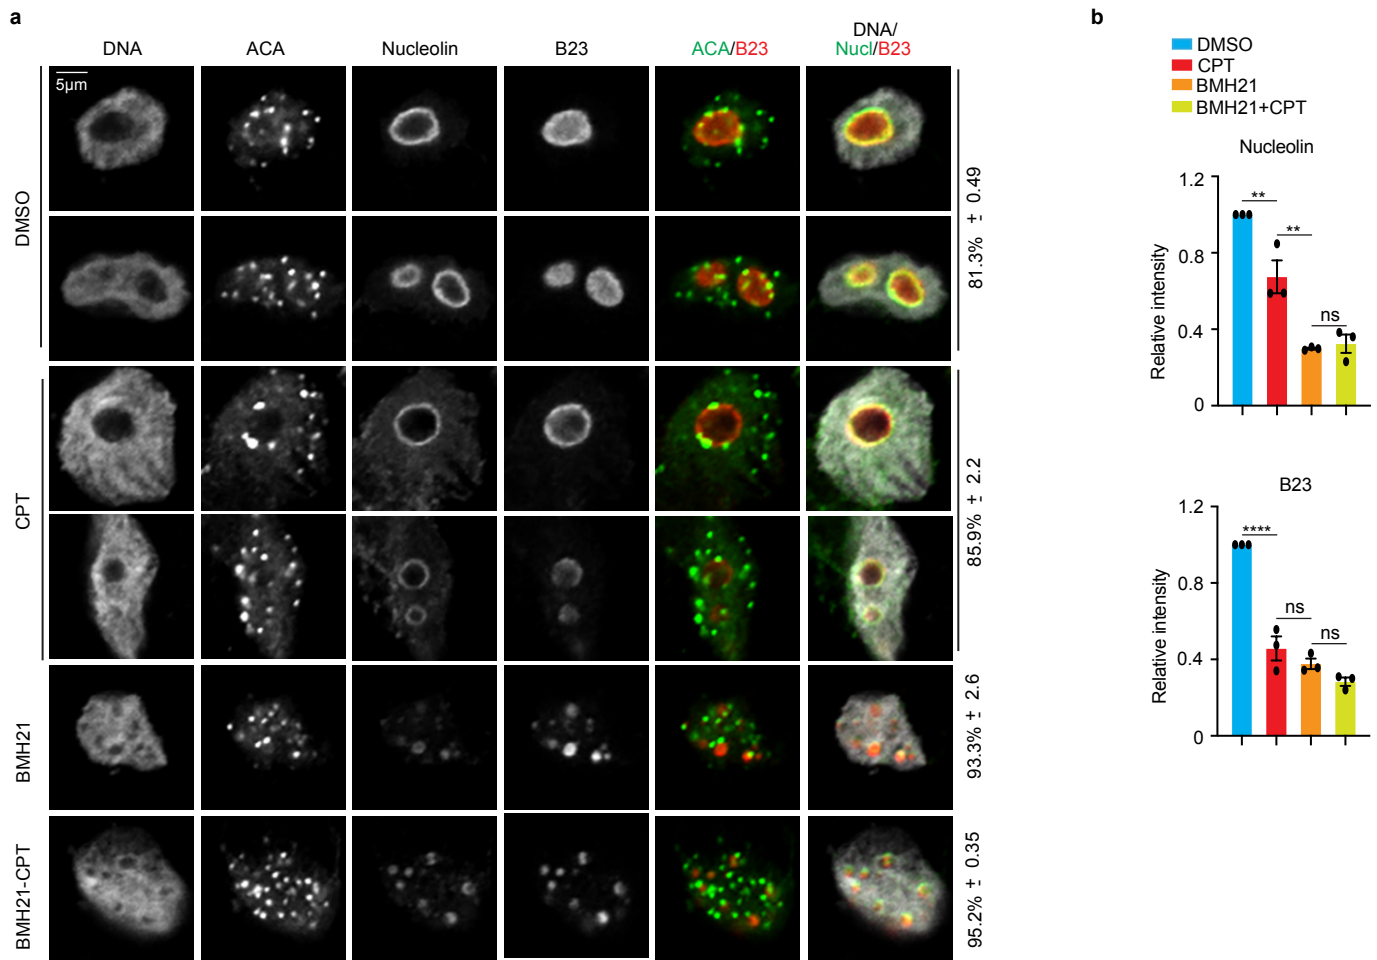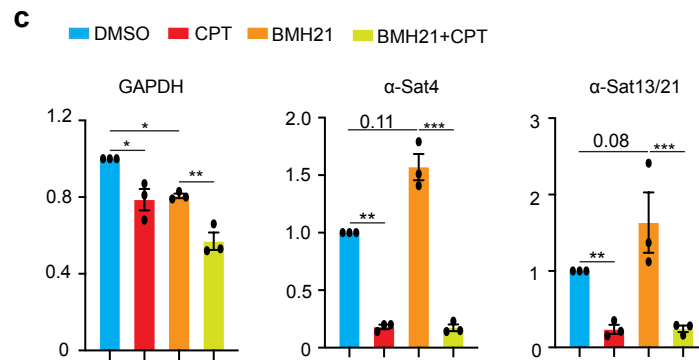

Supplementary Fig. 4

| Primers | DMSO | Etop (Fold change) |         |               |
|---------|------|--------------------|---------|---------------|
| GAPDH   | 1.00 | 0.93               |         |               |
| RPL30   | 1.00 | 0.97               |         |               |
| D1Z5-b  | 1.00 | 2.81               | ← Old   | Centromere 1  |
| D1Z5-c  | 1.00 | 10.74              | ← Old   |               |
| D1Z7    | 1.00 | 71.12              | ← Young |               |
| D2Z1    | 1.00 | 206.58             |         |               |
| D3Z1    | 1.00 | 20.77              |         |               |
| D4Z1    | 1.00 | 162.11             |         |               |
| D5Z1    | 1.00 | 139.47             |         |               |
| D6Z1    | 1.00 | 196.75             |         |               |
| D7Z1    | 1.00 | 63.20              | ← Young | Centromere 7  |
| D7Z2    | 1.00 | 407.75             | ← Old   |               |
| D8Z2    | 1.00 | 24.88              |         |               |
| D9Z4    | 1.00 | 27.50              |         |               |
| D10Z1   | 1.00 | 33.83              |         |               |
| D11Z1   | 1.00 | 261.85             |         |               |
| D12Z3   | 1.00 | 31.82              |         |               |
| D13Z1   | 1.00 | 1.17               |         |               |
| D13Z2   | 1.00 | 99.61              |         |               |
| D13Z3   | 1.00 | 6.11               |         |               |
| D13Z6   | 1.00 | 1.27               |         |               |
| D13Z7   | 1.00 | 18.18              |         |               |
| D13Z8   | 1.00 | 2.72               |         |               |
| D13Z9   | 1.00 | 8.28               |         |               |
| D14Z1   | 1.00 | 36.74              |         |               |
| D14Z2   | 1.00 | 55.56              |         |               |
| D14Z3   | 1.00 | 35.30              |         |               |
| D15Z3   | 1.00 | 22.18              |         |               |
| D16Z2   | 1.00 | 87.87              |         |               |
| D17Z1   | 1.00 | 128.83             | ← Young | Centromere 17 |
| D17Z1-b | 1.00 | 29.20              | ← Old   |               |
| D18Z1   | 1.00 | 30.23              |         |               |
| D18Z2   | 1.00 | 12.10              |         |               |
| D19Z4   | 1.00 | 1.71               |         |               |
| D19Z5   | 1.00 | 0.55               |         |               |
| D20Z2   | 1.00 | 51.70              |         |               |
| D21Z1   | 1.00 | 1.15               |         |               |
| D22Z4-1 | 1.00 | 95.65              |         |               |
| D22Z4-2 | 1.00 | 2.80               |         |               |
| D22Z5   | 1.00 | 10.83              |         |               |
| DXZ1    | 1.00 | 33.14              |         |               |

**Supplementary Fig. 5**

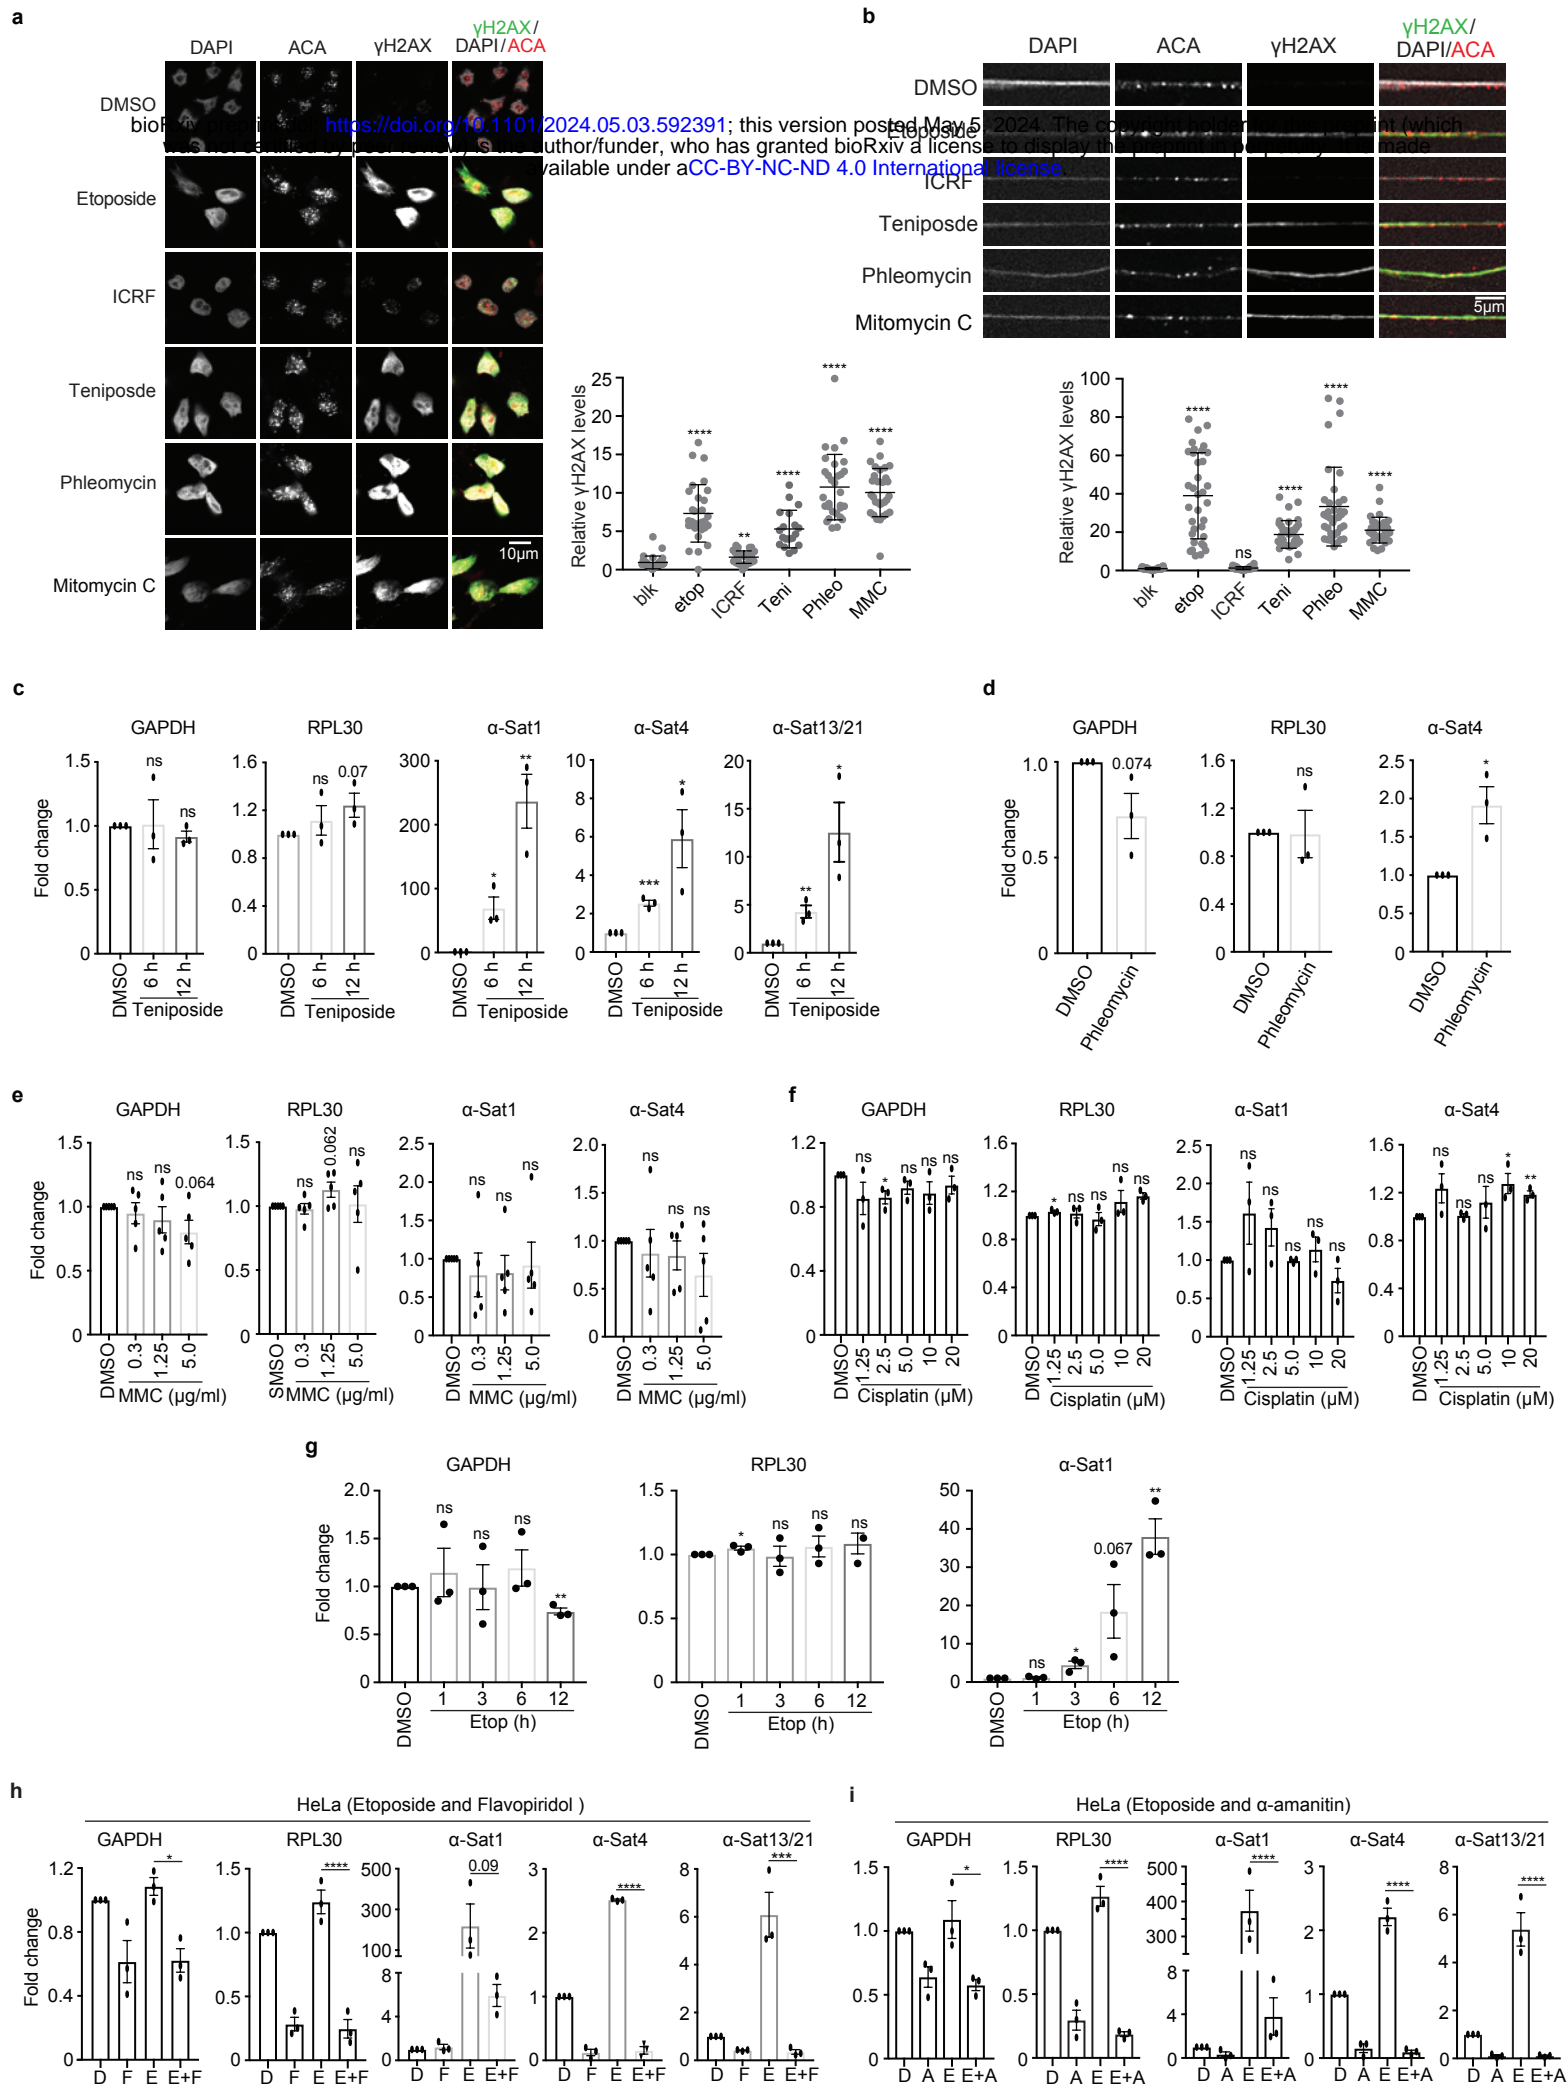

Supplementary Fig. 6

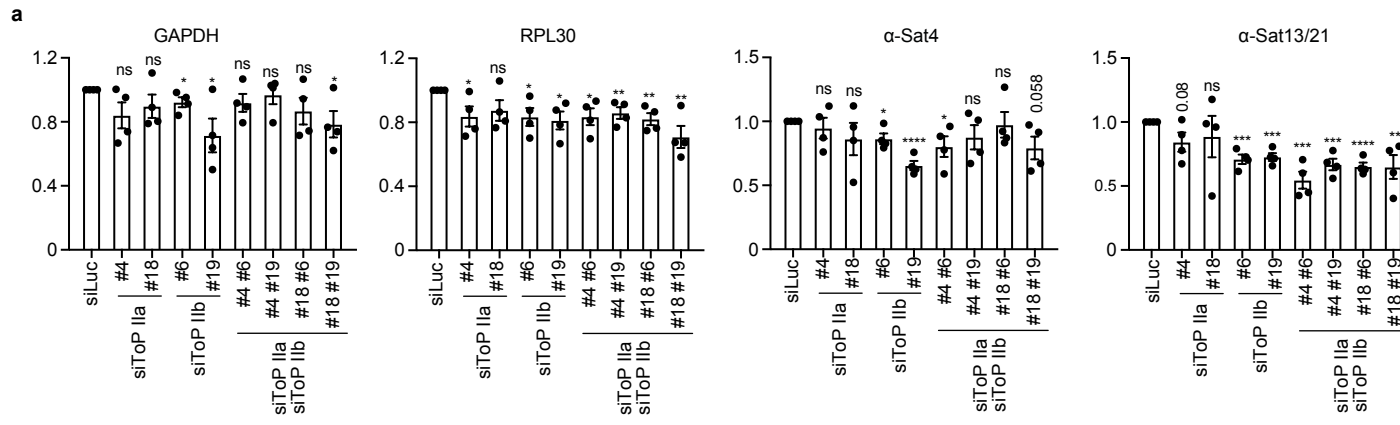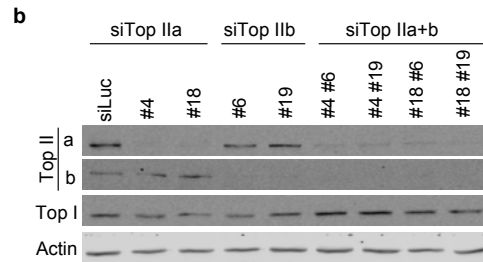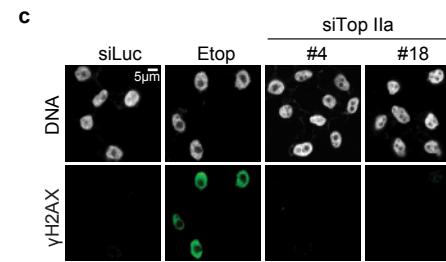

Supplementary Fig. 7

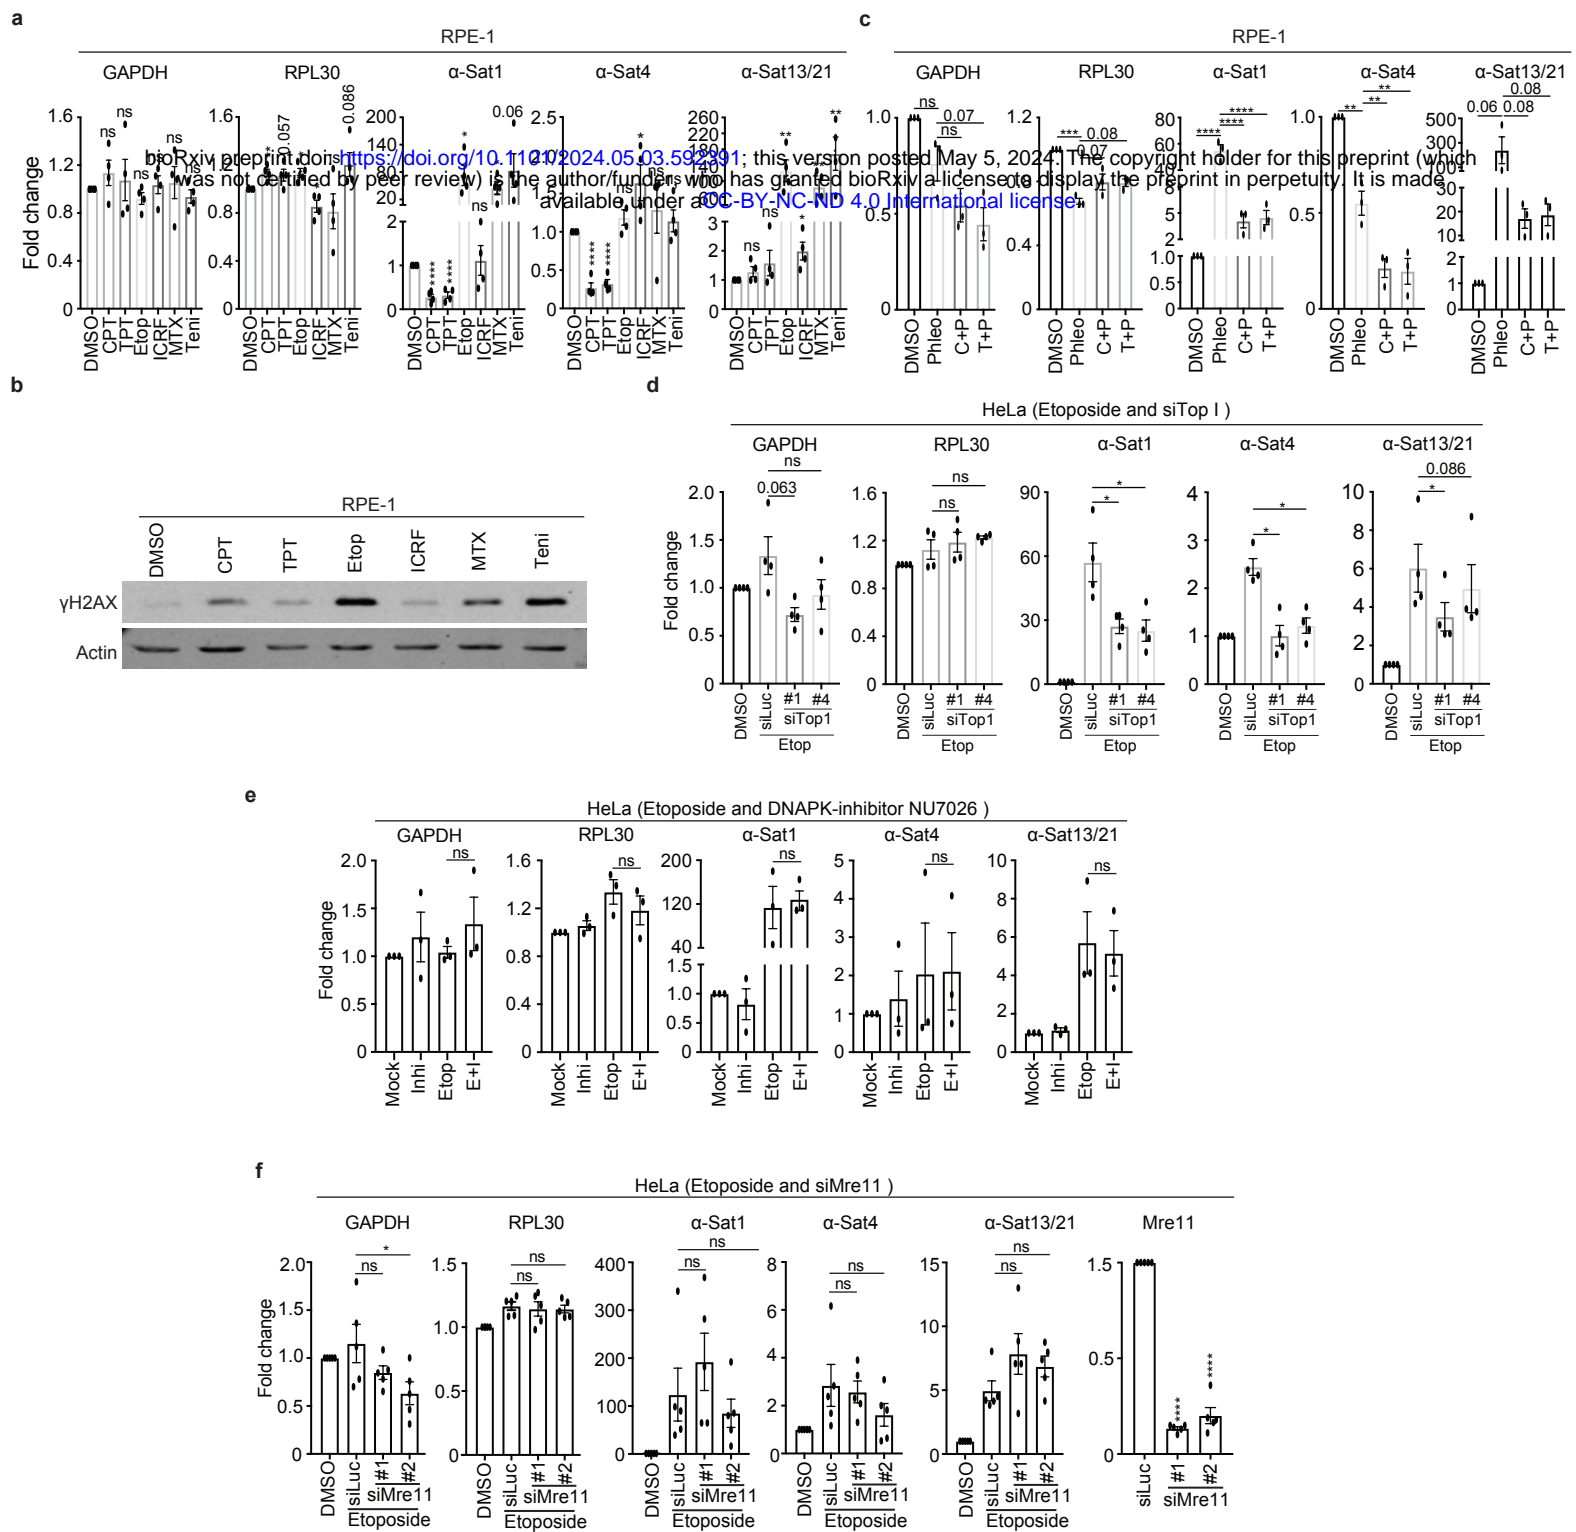

**Supplementary Fig. 8**



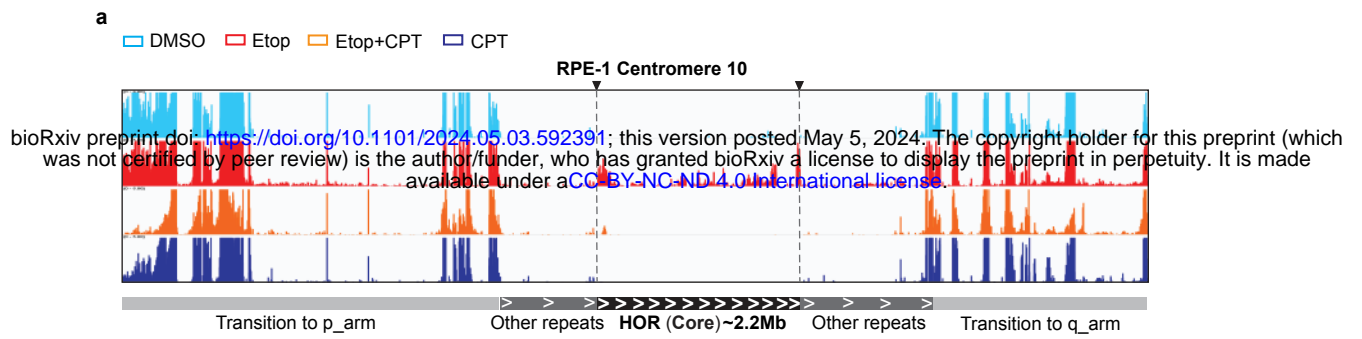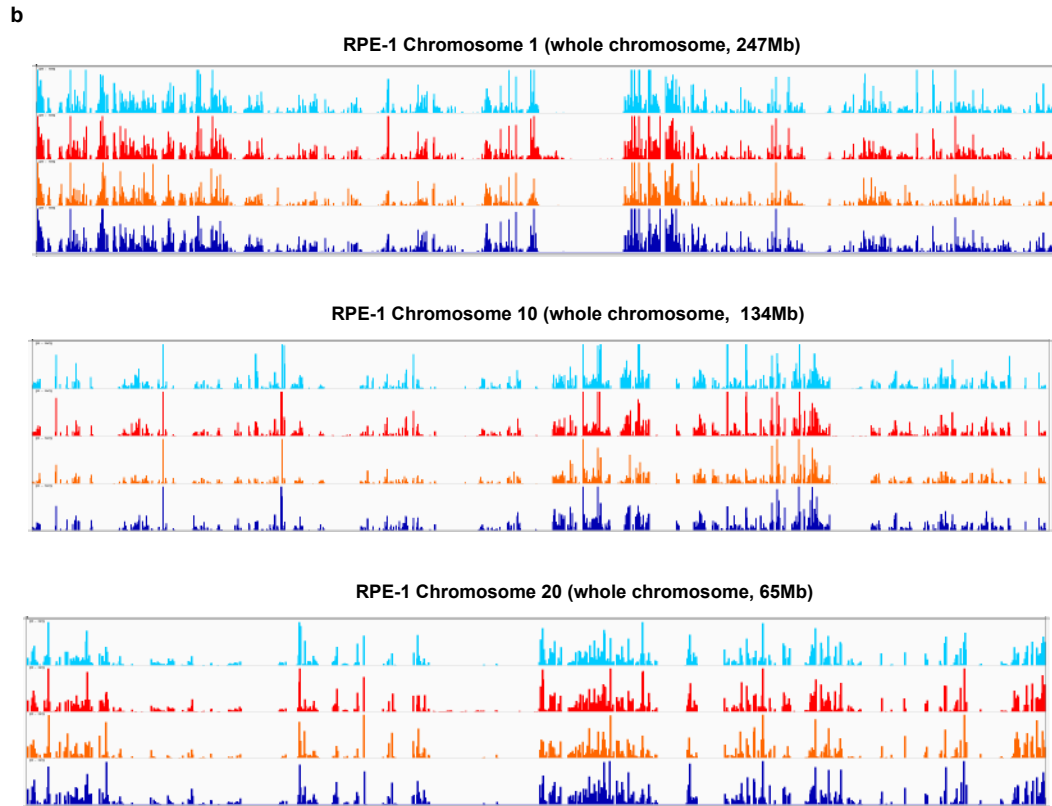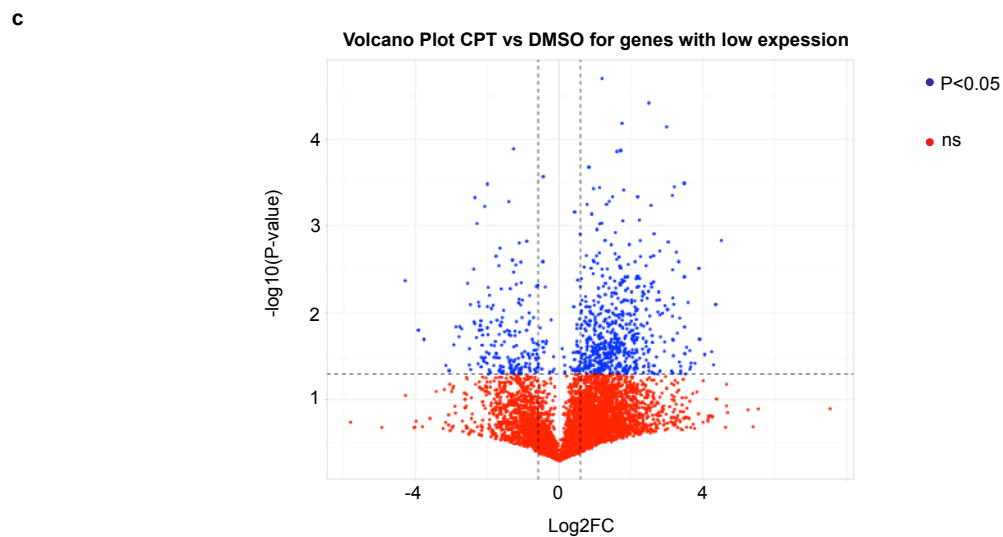

**Supplementary Fig. 9**

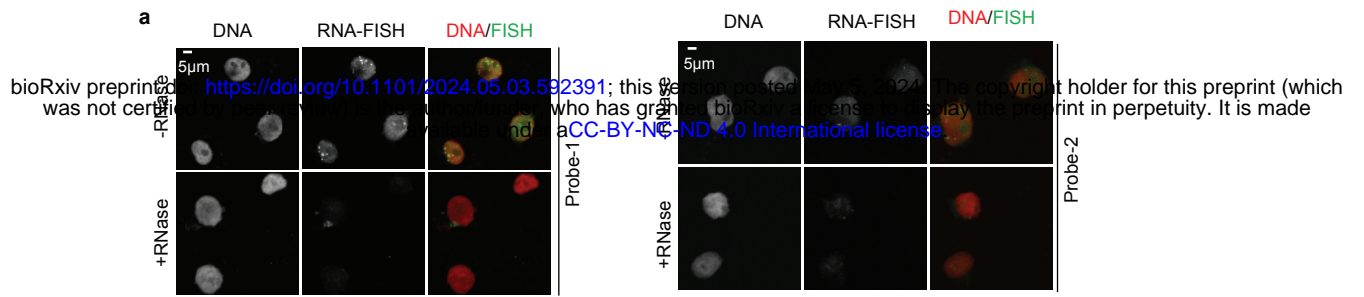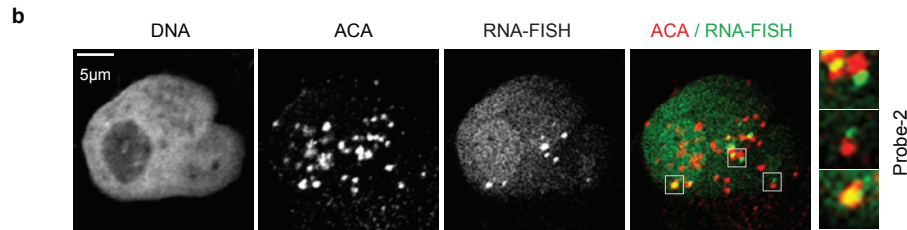

Supplementary Fig. 10
